# Supplementary material for: Genome-wide identification of Chiari malformation type I associated candidate genes and chromosomal variations
Source: PubMed Central journal article supplement (PMC7759189; doi:10.3906/biy-2009-19), 2020-12-14
Supplement: turkjbio-44-449-sup001.pdf [file turkjbio-44-449-sup001.pdf]

## Supplementary data

Supplementary Table 1. Chromosomal variations in MTR family.

| Index | Variation | Copy Number | Chromosome | Start     | End       | Lenght   | Probe | Region                                           |
|-------|-----------|-------------|------------|-----------|-----------|----------|-------|--------------------------------------------------|
| II-3  | LOF       | 0           | 19         | 41381495  | 41381648  | 154      | 14    | q13.2                                            |
| II-3  | LOF       | 0           | 19         | 41385334  | 41385869  | 536      | 12    | q13.2                                            |
| II-3  | LOF       | 0           | 19         | 41386421  | 41386814  | 394      | 12    | q13.2                                            |
| II-3  | LOF       | 0           | 22         | 24301392  | 24301824  | 433      | 15    | q11.23                                           |
| II-3  | LOF       | 0           | 22         | 24302485  | 24302603  | 119      | 6     | q11.23                                           |
| II-3  | LOF       | 0           | 22         | 42522134  | 42522313  | 180      | 7     | q13.2                                            |
| II-3  | LOH       | 2           | 1          | 6145365   | 7613598   | 1468234  | 394   | p36.31; p36.23                                   |
| II-3  | LOH       | 2           | 1          | 70257972  | 71841054  | 1583083  | 225   | p31.1                                            |
| II-3  | LOH       | 2           | 1          | 93396819  | 94462243  | 1065425  | 187   | p22.1                                            |
| II-3  | LOH       | 2           | 1          | 163508344 | 165825989 | 2317646  | 546   | q23.3; q24.1                                     |
| II-3  | LOH       | 2           | 2          | 17822     | 1833668   | 1815847  | 495   | p25.3                                            |
| II-3  | LOH       | 2           | 2          | 131112197 | 133040424 | 1928228  | 159   | q21.1; q21.2                                     |
| II-3  | LOH       | 2           | 2          | 186224432 | 189857611 | 3633180  | 486   | q32.1; q32.2                                     |
| II-3  | LOH       | 2           | 2          | 189859032 | 218663979 | 28804948 | 5881  | q32.2; q32.3; q33.1; q33.2; q33.3; q34; q35      |
| II-3  | LOH       | 2           | 3          | 101232093 | 109465442 | 8233350  | 1462  | q12.3; q13.11; q13.12; q13.13                    |
| II-3  | LOH       | 2           | 3          | 186551711 | 188766239 | 2214529  | 705   | q27.3; q28                                       |
| II-3  | LOH       | 2           | 5          | 17199259  | 27707936  | 10508678 | 1766  | p15.1; p14.3; p14.2; p14.1                       |
| II-3  | LOH       | 2           | 5          | 61758546  | 68829459  | 7070914  | 1181  | q12.1; q12.2; q12.3; q13.1; q13.2                |
| II-3  | LOH       | 2           | 5          | 70398445  | 72911803  | 2513359  | 416   | q13.2                                            |
| II-3  | LOH       | 2           | 7          | 152584806 | 159124173 | 6539368  | 2092  | q36.1; q36.2; q36.3                              |
| II-3  | LOH       | 2           | 13         | 106582808 | 115106996 | 8524189  | 2635  | q33.2; q33.3; q34                                |
| II-3  | LOH       | 2           | 14         | 38996493  | 40235485  | 1238993  | 179   | q21.1                                            |
| II-3  | LOH       | 2           | 14         | 59214061  | 62979707  | 3765647  | 723   | q23.1; q23.2                                     |
| II-3  | LOH       | 2           | 14         | 94579327  | 95678141  | 1098815  | 427   | q32.12; q32.13                                   |
| II-3  | LOH       | 2           | 14         | 95684801  | 107283150 | 11598350 | 2811  | q32.13; q32.2; q32.31; q32.32; q32.33            |
| II-3  | LOH       | 2           | 15         | 24008242  | 25907528  | 1899287  | 406   | q11.2; q12                                       |
| II-3  | LOH       | 2           | 15         | 66372477  | 77276650  | 10904174 | 2552  | q22.31; q22.32; q22.33; q23; q24.1; q24.2; q24.3 |
| II-3  | LOH       | 2           | 16         | 2133716   | 5180366   | 3046651  | 906   | p13.3                                            |
| II-3  | LOH       | 2           | 16         | 22817446  | 27061619  | 4244174  | 1308  | p12.2; p12.1                                     |
| II-3  | LOH       | 2           | 17         | 15647723  | 17200920  | 1553198  | 305   | p12; p11.2                                       |
| II-3  | LOH       | 2           | 22         | 47105302  | 51214796  | 4109495  | 1515  | q13.31; q13.32; q13.33                           |
| II-3  | LOH       | 2           | X          | 41302842  | 54735349  | 13432508 | 1963  | p11.4; p11.3; p11.23; p11.22                     |
| II-3  | LOH       | 2           | X          | 107253323 | 108530481 | 1277159  | 126   | q22.3                                            |
| II-3  | LOH       | 2           | X          | 153363118 | 154913173 | 1550056  | 441   | q28                                              |
| II-3  | LOH       | 2           | X          | 88484868  | 89798620  | 1313753  | 193   | q21.31                                           |
| II-4  | GOF       | 3           | 1          | 110230206 | 110241385 | 11180    | 72    | p13.3                                            |
| II-4  | GOF       | 3           | 13         | 32914933  | 32915231  | 299      | 87    | q13.1                                            |
| II-4  | LOF       | 0           | 19         | 41349596  | 41349656  | 61       | 9     | q13.2                                            |
| II-4  | LOF       | 0           | 19         | 41381553  | 41381648  | 96       | 3     | q13.2                                            |

Supplementary Table 1. Continued.

| Index | Variation | Copy Number | Chromosome | Start     | End       | Lenght   | Probe | Region                                                              |
|-------|-----------|-------------|------------|-----------|-----------|----------|-------|---------------------------------------------------------------------|
| II-4  | GOF       | 3           | 22         | 24374253  | 24385622  | 11370    | 119   | q11.23                                                              |
| II-4  | LOF       | 0           | 22         | 42522134  | 42522313  | 180      | 7     | q13.2                                                               |
| II-4  | LOH       | 2           | 1          | 6145365   | 7613598   | 1468234  | 394   | p36.31; p36.23                                                      |
| II-4  | LOH       | 2           | 1          | 163508344 | 165825989 | 2317646  | 546   | q23.3; q24.1                                                        |
| II-4  | LOH       | 2           | 1          | 190520424 | 191922512 | 1402089  | 196   | q31.1; q31.2                                                        |
| II-4  | LOH       | 2           | 2          | 4247903   | 7256134   | 3008232  | 731   | p25.3; p25.2; p25.1                                                 |
| II-4  | LOH       | 2           | 3          | 22204135  | 24882331  | 2678197  | 626   | p24.3; p24.2                                                        |
| II-4  | LOH       | 2           | 3          | 84961960  | 86378386  | 1416427  | 198   | p12.1                                                               |
| II-4  | LOH       | 2           | 3          | 101232093 | 122707286 | 21475194 | 4080  | q12.3; q13.11; q13.12; q13.13; q13.2; q13.31; q13.32; q13.33; q21.1 |
| II-4  | LOH       | 2           | 4          | 38380620  | 40684941  | 2304322  | 569   | p14                                                                 |
| II-4  | LOH       | 2           | 4          | 40686808  | 49620838  | 8934031  | 1556  | p14; p13; p12; p11                                                  |
| II-4  | LOH       | 2           | 4          | 52684820  | 55432159  | 2747340  | 467   | q11; q12                                                            |
| II-4  | LOH       | 2           | 4          | 180961974 | 182534983 | 1573010  | 482   | q34.3                                                               |
| II-4  | LOH       | 2           | 7          | 1604320   | 2911972   | 1307653  | 384   | p22.3; p22.2                                                        |
| II-4  | LOH       | 2           | 7          | 39423916  | 40485935  | 1062020  | 140   | p14.1                                                               |
| II-4  | LOH       | 2           | 8          | 172972    | 10464604  | 10291633 | 3729  | p23.3; p23.2; p23.1                                                 |
| II-4  | LOH       | 2           | 8          | 10480500  | 13002472  | 2521973  | 647   | p23.1; p22                                                          |
| II-4  | LOH       | 2           | 8          | 14020120  | 15045555  | 1025436  | 309   | p22                                                                 |
| II-4  | LOH       | 2           | 8          | 23194680  | 43791691  | 20597012 | 4094  | p21.3; p21.2; p21.1; p12; p11.23; p11.22 p11.21; p11.1              |
| II-4  | LOH       | 2           | 8          | 46936719  | 54991386  | 8054668  | 1202  | q11.1; q11.21; q11.22; q11.23                                       |
| II-4  | LOH       | 2           | 9          | 25581774  | 45755225  | 20173452 | 2904  | p21.3; p21.2; p21.1; p13.3; p13.2; p13.1; p12; p11.2                |
| II-4  | LOH       | 2           | 9          | 70906647  | 81587711  | 10681065 | 2205  | q21.11; q21.12; q21.13; q21.2; q21.31                               |
| II-4  | LOH       | 2           | 10         | 32054404  | 33708671  | 1654268  | 247   | p11.22                                                              |
| II-4  | LOH       | 2           | 11         | 84837883  | 86448092  | 1610210  | 272   | q14.1; q14.2                                                        |
| II-4  | LOH       | 2           | 13         | 106582808 | 111438085 | 4855278  | 1584  | q33.2; q33.3; q34                                                   |
| II-4  | LOH       | 2           | 15         | 24008242  | 25907528  | 1899287  | 406   | q11.2; q12                                                          |
| II-4  | LOH       | 2           | 16         | 24326722  | 27061619  | 2734898  | 689   | p12.1                                                               |
| II-4  | LOH       | 2           | 18         | 37617494  | 42358137  | 4740644  | 789   | q12.3                                                               |
| II-4  | LOH       | 2           | 20         | 1916836   | 4595025   | 2678190  | 754   | p13                                                                 |
| II-4  | LOH       | 2           | 21         | 36528182  | 37981249  | 1453068  | 357   | q22.12; q22.13                                                      |
| II-4  | LOH       | 2           | 22         | 47105302  | 51214796  | 4109495  | 1515  | q13.31; q13.32; q13.33                                              |
| II-4  | LOH       | 2           | X          | 153363118 | 154913173 | 1550056  | 441   | q28                                                                 |

Supplementary Table 2. Chromosomal variations in SOY family.

| Index | Variation | Copy Number | Chromosome | Start     | End       | Lenght   | Probe | Region                                                  |
|-------|-----------|-------------|------------|-----------|-----------|----------|-------|---------------------------------------------------------|
| I-2   | GOF       | 3           | 1          | 110220086 | 110245765 | 25680    | 85    | p13.3                                                   |
| I-2   | LOF       | 1           | 7          | 64693037  | 65087974  | 394938   | 43    | q11.21                                                  |
| I-2   | LOF       | 1           | 11         | 5248193   | 5248250   | 58       | 25    | p15.4                                                   |
| I-2   | GOF       | 3           | 11         | 37582575  | 38114401  | 531827   | 98    | p12                                                     |
| I-2   | LOF       | 0           | 19         | 41385334  | 41385775  | 442      | 9     | q13.2                                                   |
| I-2   | LOF       | 0           | 19         | 41386421  | 41386677  | 257      | 9     | q13.2                                                   |
| I-2   | LOF       | 0           | 22         | 42522134  | 42522313  | 180      | 7     | q13.2                                                   |
| I-2   | LOH       | 2           | 1          | 71051569  | 73583976  | 2532408  | 334   | p31.1                                                   |
| I-2   | LOH       | 2           | 3          | 28984225  | 50013778  | 21029554 | 5513  | p24.1; p23; p22.3; p22.2; p22.1; p21.33; p21.32; p21.31 |
| I-2   | LOH       | 2           | 3          | 50129399  | 53662306  | 3532908  | 568   | p21.31; p21.2; p21.1                                    |
| I-2   | LOH       | 2           | 4          | 8924210   | 10061147  | 1136938  | 155   | p16.1                                                   |
| I-2   | LOH       | 2           | 4          | 153882282 | 154995463 | 1113182  | 278   | q31.3                                                   |
| I-2   | LOH       | 2           | 5          | 63221842  | 64265857  | 1044016  | 131   | q12.3                                                   |
| I-2   | LOH       | 2           | 6          | 27339418  | 28641735  | 1302318  | 341   | p22.1                                                   |
| I-2   | LOH       | 2           | 7          | 86443168  | 87754969  | 1311802  | 373   | q21.12                                                  |
| I-2   | LOH       | 2           | 9          | 135425830 | 141068637 | 5642808  | 2342  | q34.13 q34.2; q34.3                                     |
| I-2   | LOH       | 2           | 12         | 116775148 | 118395127 | 1619980  | 467   | q24.21; q24.22; q24.23                                  |
| I-2   | LOH       | 2           | 13         | 111294811 | 112868642 | 1573832  | 492   | q34                                                     |
| I-2   | LOH       | 2           | 14         | 52006390  | 54290388  | 2283999  | 496   | q22.1; q22.2                                            |
| I-2   | LOH       | 2           | 14         | 55997611  | 65701286  | 9703676  | 2108  | q22.3; q23.1; q23.2; q23.3                              |
| I-2   | LOH       | 2           | 15         | 43818532  | 45440621  | 1622090  | 300   | q15.3; q21.1                                            |
| I-2   | LOH       | 2           | 16         | 3370894   | 6896128   | 3525235  | 1231  | p13.3                                                   |
| I-2   | LOH       | 2           | 17         | 13671552  | 22234751  | 8563200  | 1690  | p12 p11.2; p11.1                                        |
| I-2   | LOH       | 2           | 17         | 25311244  | 31320695  | 6009452  | 1060  | q11.1; q11.2                                            |
| I-2   | LOH       | 2           | 19         | 41928183  | 59097933  | 17169751 | 5017  | q13.2; q13.31; q13.32; q13.33; q13.41; q13.42; q13.43   |
| I-2   | LOH       | 2           | 21         | 25902463  | 39947747  | 14045285 | 3245  | q21.2; q21.3; q22.11; q22.12; q22.13; q22.2             |
| I-2   | LOH       | 2           | 22         | 31535872  | 32662384  | 1126513  | 185   | q12.2; q12.3                                            |
| I-2   | LOH       | 2           | 22         | 45395342  | 49074301  | 3678960  | 1247  | q13.31; q13.32                                          |
| I-2   | LOH       | 2           | 22         | 49591992  | 51214796  | 1622805  | 626   | q13.33                                                  |
| I-2   | LOH       | 2           | X          | 86683205  | 87698139  | 1014935  | 225   | q21.31                                                  |
| II-2  | GOF       | 3           | 1          | 110228436 | 110245765 | 17330    | 84    | p13.3                                                   |
| II-2  | LOF       | 1           | 11         | 5248193   | 5248250   | 58       | 25    | p15.4                                                   |
| II-2  | LOF       | 1           | 16         | 30208520  | 30212911  | 4392     | 29    | p11.2                                                   |
| II-2  | LOF       | 1           | 19         | 11224269  | 11224319  | 51       | 16    | p13.2                                                   |
| II-2  | LOF       | 1           | 19         | 11231099  | 11231159  | 61       | 23    | p13.2                                                   |
| II-2  | LOF       | 1           | 19         | 41381495  | 41381648  | 154      | 14    | q13.2                                                   |
| II-2  | LOF       | 0           | 19         | 41382010  | 41382256  | 247      | 3     | q13.2                                                   |
| II-2  | LOF       | 1           | 19         | 41384103  | 41385869  | 1767     | 39    | q13.2                                                   |
| II-2  | LOF       | 0           | 22         | 24301392  | 24301695  | 304      | 12    | q11.23                                                  |
| II-2  | LOF       | 1           | 22         | 24301824  | 24302487  | 664      | 24    | q11.23                                                  |

Supplementary Table 2. Continued.

| Index | Variation | Copy Number | Chromosome | Start     | End       | Lenght   | Probe | Region                                          |
|-------|-----------|-------------|------------|-----------|-----------|----------|-------|-------------------------------------------------|
| II-2  | GOF       | 3           | 22         | 24375632  | 24385472  | 9841     | 102   | q11.23                                          |
| II-2  | LOF       | 0           | 22         | 42522134  | 42522397  | 264      | 10    | q13.2                                           |
| II-2  | GOF       | 2           | X          | 48303837  | 48386632  | 82796    | 39    | p11.23                                          |
| II-2  | GOF       | 2           | X          | 99661925  | 99663226  | 1302     | 31    | q22.1                                           |
| II-2  | LOF       | 0           | Y          | 2654333   | 10068588  | 7414256  | 1564  | p11.31; p11.2                                   |
| II-2  | LOF       | 0           | Y          | 13133499  | 19567718  | 6434220  | 2157  | q11.1; q11.21; q11.221                          |
| II-2  | LOF       | 0           | Y          | 20804835  | 24522333  | 3717499  | 1197  | q11.222; q11.223                                |
| II-2  | LOF       | 0           | Y          | 28509482  | 28817636  | 308155   | 32    | q11.23; q12                                     |
| II-2  | LOH       | 2           | 1          | 54124121  | 68741305  | 14617185 | 3487  | p32.3; p32.2; p32.1; p31.3                      |
| II-2  | LOH       | 2           | 1          | 118941488 | 120405606 | 1464119  | 290   | p12                                             |
| II-2  | LOH       | 2           | 2          | 40078780  | 47639559  | 7560780  | 2169  | p22.1; p21                                      |
| II-2  | LOH       | 2           | 2          | 47639598  | 49190917  | 1551320  | 1207  | p21; p16.3                                      |
| II-2  | LOH       | 2           | 2          | 49194702  | 51819167  | 2624466  | 582   | p16.3                                           |
| II-2  | LOH       | 2           | 3          | 417207    | 3518222   | 3101016  | 1023  | p26.3; p26.2                                    |
| II-2  | LOH       | 2           | 3          | 3526289   | 16281960  | 12755672 | 4051  | p26.2; p26.1; p25.3; p25.2; p25.1               |
| II-2  | LOH       | 2           | 3          | 53599972  | 60113719  | 6513748  | 1523  | p21.1; p14.3; p14.2                             |
| II-2  | LOH       | 2           | 4          | 8924210   | 10416360  | 1492151  | 241   | p16.1                                           |
| II-2  | LOH       | 2           | 4          | 76475804  | 84664343  | 8188540  | 1570  | q21.1; q21.21; q21.22; q21.23                   |
| II-2  | LOH       | 2           | 4          | 121814232 | 124359046 | 2544815  | 504   | q27; q28.1                                      |
| II-2  | LOH       | 2           | 4          | 154938646 | 163486514 | 8547869  | 1766  | q31.3; q32.1; q32.2                             |
| II-2  | LOH       | 2           | 4          | 174490092 | 176125249 | 1635158  | 366   | q34.1                                           |
| II-2  | LOH       | 2           | 5          | 88215821  | 90698051  | 2482231  | 478   | q14.3                                           |
| II-2  | LOH       | 2           | 6          | 162699    | 6780870   | 6618172  | 1943  | p25.3; p25.2; p25.1                             |
| II-2  | LOH       | 2           | 6          | 27339418  | 28470909  | 1131492  | 303   | p22.1                                           |
| II-2  | LOH       | 2           | 7          | 134976271 | 151415504 | 16439234 | 4120  | q33; q34; q35; q36.1                            |
| II-2  | LOH       | 2           | 8          | 73231464  | 92409428  | 19177965 | 3207  | q13.3; q21.11; q21.12; q21.13; q21.2; q21.3     |
| II-2  | LOH       | 2           | 8          | 92419127  | 112996602 | 20577476 | 3869  | q21.3; q22.1; q22.2; q22.3; q23.1; q23.2; q23.3 |
| II-2  | LOH       | 2           | 9          | 4355828   | 7231323   | 2875496  | 751   | p24.2; p24.1                                    |
| II-2  | LOH       | 2           | 9          | 87666681  | 94821398  | 7154718  | 1568  | q21.33; q22.1; q22.2; q22.31                    |
| II-2  | LOH       | 2           | 9          | 95700701  | 105041325 | 9340625  | 1947  | q22.31; q22.32; q22.33; q31.1                   |
| II-2  | LOH       | 2           | 9          | 135284962 | 136411084 | 1126123  | 582   | q34.13; q34.2                                   |
| II-2  | LOH       | 2           | 9          | 136414531 | 140377226 | 3962696  | 1654  | q34.2; q34.3                                    |
| II-2  | LOH       | 2           | 10         | 82704505  | 90740501  | 8035997  | 1817  | q23.1; q23.2; q23.31                            |
| II-2  | LOH       | 2           | 10         | 105721994 | 117935672 | 12213679 | 2482  | q24.33; q25.1; q25.2; q25.3                     |
| II-2  | LOH       | 2           | 10         | 118201081 | 120767115 | 2566035  | 680   | q25.3; q26.11                                   |
| II-2  | LOH       | 2           | 11         | 71287843  | 84543955  | 13256113 | 2912  | q13.4; q13.5; q14.1                             |
| II-2  | LOH       | 2           | 11         | 84545984  | 85993211  | 1447228  | 219   | q14.1; q14.2                                    |
| II-2  | LOH       | 2           | 11         | 86040620  | 94708891  | 8668272  | 1742  | q14.2; q14.3; q21                               |
| II-2  | LOH       | 2           | 11         | 114074756 | 120678788 | 6604033  | 1893  | q23.2; q23.3                                    |
| II-2  | LOH       | 2           | 12         | 74028301  | 75054053  | 1025753  | 124   | q21.1                                           |

Supplementary Table 2. Continued.

| Index | Variation | Copy Number | Chromosome | Start     | End       | Lenght   | Probe | Region                                                |
|-------|-----------|-------------|------------|-----------|-----------|----------|-------|-------------------------------------------------------|
| II-2  | LOH       | 2           | 12         | 106729425 | 118395127 | 11665703 | 2819  | q23.3; q24.11; q24.12; q24.13; q24.21; q24.22; q24.23 |
| II-2  | LOH       | 2           | 12         | 129107131 | 132104045 | 2996915  | 1127  | q24.32; q24.33                                        |
| II-2  | LOH       | 2           | 12         | 132124118 | 133801770 | 1677653  | 437   | q24.33                                                |
| II-2  | LOH       | 2           | 15         | 40725601  | 41829178  | 1103578  | 208   | q15.1                                                 |
| II-2  | LOH       | 2           | 15         | 98720899  | 100928615 | 2207717  | 732   | q26.3                                                 |
| II-2  | LOH       | 2           | 16         | 92688     | 4417797   | 4325110  | 1683  | p13.3                                                 |
| II-2  | LOH       | 2           | 16         | 84314573  | 85915218  | 1600646  | 657   | q24.1                                                 |
| II-2  | LOH       | 2           | 17         | 26800204  | 27889643  | 1089440  | 196   | q11.2                                                 |
| II-2  | LOH       | 2           | 18         | 30089478  | 43049523  | 12960046 | 2186  | q12.1; q12.2; q12.3                                   |
| II-2  | LOH       | 2           | 18         | 43065107  | 44181227  | 1116121  | 352   | q12.3; q21.1                                          |
| II-2  | LOH       | 2           | 18         | 55839162  | 59015339  | 3176178  | 832   | q21.31; q21.32; q21.33                                |
| II-2  | LOH       | 2           | 18         | 59020751  | 70724185  | 11703435 | 2705  | q21.33; q22.1; q22.2; q22.3                           |
| II-2  | LOH       | 2           | 20         | 19885390  | 26266524  | 6381135  | 1189  | p11.23; p11.22; p11.21; p11.1                         |
| II-2  | LOH       | 2           | 20         | 29459599  | 36296688  | 6837090  | 1092  | q11.21; q11.22; q11.23                                |
| II-2  | LOH       | 2           | 20         | 36305516  | 39043958  | 2738443  | 525   | q11.23; q12                                           |
| II-2  | LOH       | 2           | 20         | 39045734  | 40070246  | 1024513  | 238   | q12                                                   |
| II-2  | LOH       | 2           | 20         | 40078085  | 55450089  | 15372005 | 3982  | q12; q13.11; q13.12; q13.13; q13.2; q13.31            |
| II-2  | LOH       | 2           | 21         | 18457828  | 21038473  | 2580646  | 613   | q21.1                                                 |
| II-2  | LOH       | 2           | 21         | 25902463  | 36223627  | 10321165 | 2267  | q21.2; q21.3; q22.11; q22.12                          |
| II-2  | LOH       | 2           | X          | 519500    | 1846919   | 1327420  | 228   | p22.33                                                |

GOF: gain of function, LOH: loss of heterozygosity, LOF: loss of function.
